# Supplementary material for: A tryparedoxin-coupled biosensor reveals a mitochondrial trypanothione metabolism in trypanosomes
Source: eLife. 2020 Jan 31;9:e53227. doi: 10.7554/eLife.53227 (PMC7046469; doi:10.7554/eLife.53227)
Supplement: Figure 1—figure supplement 3—source data 1. [file elife-53227-fig1-figsupp3-data1.xlsx]

## Sheet: rec. Tpx-roGFP2
recombinant Tpx-roGFP2 + 1 µM TS2
Time [min]	400/520 nm raw data	400/520 nm blank corrected	485/520 nm raw data	485/520 nm blank corrected
0	69850	67896	170440	170259
0.55	71146	69239	173444	173268
1.1	68755	66853	166515	166337
1.65	67949	66041	165056	164877
2.2	67290	65342	163342	163163
2.75	69242	67304	160754	160574
4.4	70224	68276	156100	155921
4.95	71936	69998	153671	153492
5.5	73855	71924	151447	151268
6.05	75669	73744	148695	148518
6.6	77542	75591	146593	146416
7.15	79676	77741	144889	144714
7.7	81816	79899	143407	143231
8.25	83775	81845	142151	141977
8.8	86174	84264	140971	140795
9.35	88317	86414	139882	139706
9.9	90225	88321	138548	138372
10.45	91997	90104	137200	137028
11	94135	92240	136442	136270
11.55	96292	94390	135406	135231
12.1	98067	96177	134331	134155
12.65	99606	97679	132857	132681
13.2	101086	99179	131590	131414
13.75	102757	100855	130525	130351
14.3	104138	102243	129309	129133
14.85	105990	104100	127873	127697
15.4	107156	105266	126717	126541
15.95	108713	106785	125868	125692
16.5	109891	107998	124605	124432
17.05	111211	109291	123217	123042
17.6	112144	110255	122151	121978
18.15	113528	111614	121328	121155
18.7	114839	112954	120279	120104
19.25	116256	114358	119430	119254
19.8	117322	115437	118372	118199
20.35	118084	116168	117450	117276
20.9	119046	117144	116274	116101
21.45	120115	118215	115379	115204
22	121083	119192	114497	114324
22.55	122110	120215	113640	113468
23.1	123112	121224	112733	112559
23.65	123614	121722	111752	111580
24.2	124887	122979	111046	110874
24.75	125524	123615	109988	109813
25.3	126351	124445	109097	108923
25.85	126956	125067	108580	108406
26.4	128071	126187	107739	107565
26.95	128985	127096	107325	107153
27.5	129831	127937	106724	106551
28.05	130574	128703	105958	105783
28.6	131710	129803	105461	105288
29.15	132256	130326	104879	104705
29.7	133273	131373	104579	104404
30.25	134015	132117	103854	103679
30.8	134839	132939	103165	102990
31.35	135296	133414	102676	102499
31.9	136146	134245	102186	102013
32.45	137096	135182	101688	101513
33	137826	135904	101282	101109
33.55	138421	136512	100732	100557
34.1	138815	136915	100224	100049
34.65	139654	137739	99888	99712
35.2	140429	138502	99437	99264
35.75	140694	138770	98825	98652
36.3	141333	139410	98366	98189
36.85	141728	139810	97930	97754
37.4	142054	140142	97452	97276
37.95	142713	140792	97014	96840
38.5	143289	141377	96469	96291
39.05	144067	142130	96134	95958
39.6	144462	142528	95667	95488
40.15	144658	142717	95262	95082
40.7	145163	143208	94933	94756
41.25	145857	143922	94666	94487
41.8	146379	144430	94275	94098
42.35	146565	144591	93949	93769
42.9	147360	145425	93688	93509
43.45	148193	146258	93509	93331
44	148130	146175	93167	92990
44.55	148861	146884	92747	92568
45.1	149141	147188	92273	92097
45.65	149059	147106	91960	91783
46.2	150046	148075	91802	91623
46.75	150373	148408	91484	91308
47.3	150549	148598	91135	90958
47.85	150893	148944	90764	90585
48.4	150998	149052	90606	90429
48.95	151726	149770	90189	90009
49.5	152079	150125	90071	89893
50.05	152493	150536	89732	89553
50.6	152654	150701	89549	89370
51.15	152824	150897	89190	89011
51.7	152990	151019	88902	88723
52.25	152872	150906	88690	88513
52.8	153301	151333	88332	88153
53.35	154049	152118	88055	87875
53.9	153725	151756	87926	87746
54.45	154480	152515	87528	87350
55	154460	152520	87286	87105
55.55	154686	152717	86895	86715

## Sheet: rec. hGrx1-roGFP2
recombinant hGrx1-roGFP2 + 1 µM TS2
Time [min]	400/520 nm raw data	400/520 nm blank corrected	485/520 nm raw data	485/520 nm blank corrected
0	60014	58764	137949	137835
0.55	60135	58889	136923	136807
1.1	59431	58167	134466	134352
1.65	59650	58404	133314	133202
2.2	59875	58624	133082	132970
2.75	59120	57868	128783	128671
4.4	59486	58238	125200	125089
4.95	60142	58913	122623	122511
5.5	61325	60087	120888	120778
6.05	62310	61083	119555	119443
6.6	63240	62005	118428	118317
7.15	64336	63118	116987	116878
7.7	65450	64233	115964	115851
8.25	66544	65328	115377	115264
8.8	67738	66516	114608	114497
9.35	68600	67375	113755	113648
9.9	69868	68653	112859	112750
10.45	70849	69637	112217	112107
11	71733	70509	111737	111624
11.55	72653	71405	110847	110739
12.1	73649	72415	110444	110334
12.65	74656	73427	109885	109773
13.2	75702	74458	109187	109075
13.75	76341	75107	108657	108548
14.3	77481	76242	107902	107790
14.85	78197	76964	107384	107273
15.4	79109	77871	106761	106649
15.95	79851	78618	106039	105928
16.5	80321	79088	105685	105577
17.05	81364	80125	105149	105038
17.6	82155	80922	104433	104320
18.15	83125	81886	104110	103998
18.7	83623	82383	103430	103323
19.25	84346	83115	102951	102841
19.8	85359	84125	102475	102366
20.35	85730	84499	101737	101627
20.9	86371	85145	101081	100969
21.45	86958	85716	100834	100723
22	87498	86259	100136	100027
22.55	88275	87039	99505	99394
23.1	88946	87714	98856	98746
23.65	89625	88395	98310	98199
24.2	89764	88544	97837	97727
24.75	90552	89307	97385	97277
25.3	91262	90019	96853	96742
25.85	91934	90677	96297	96185
26.4	92070	90830	95608	95498
26.95	92613	91378	95426	95314
27.5	93081	91843	94735	94624
28.05	93794	92570	94505	94392
28.6	94081	92851	93957	93845
29.15	94826	93589	93316	93203
29.7	95335	94102	93105	92991
30.25	96036	94805	92626	92512
30.8	96292	95054	92110	92002
31.35	97210	95971	91625	91518
31.9	97264	96021	91183	91071
32.45	97689	96452	90557	90446
33	98231	96985	90053	89938
33.55	98724	97481	89915	89804
34.1	99168	97926	89390	89278
34.65	99752	98520	89319	89209
35.2	100201	98976	88745	88636
35.75	100794	99529	88287	88176
36.3	100961	99720	88002	87891
36.85	101926	100682	87629	87514
37.4	102125	100883	87304	87193
37.95	102796	101561	86999	86890
38.5	103368	102123	86883	86771
39.05	103658	102427	86468	86357
39.6	104120	102887	86261	86151
40.15	104584	103341	85873	85761
40.7	104988	103762	85411	85299
41.25	105229	103989	84988	84876
41.8	105946	104714	84732	84620
42.35	106112	104873	84519	84408
42.9	106617	105376	84108	84000
43.45	106870	105648	83828	83718
44	106999	105778	83533	83424
44.55	107751	106524	83379	83269
45.1	108266	107039	83090	82982
45.65	108087	106872	82532	82427
46.2	108544	107340	82401	82292
46.75	108911	107707	82214	82108
47.3	109659	108446	81899	81791
47.85	109930	108716	81570	81460
48.4	110241	109031	81491	81384
48.95	110618	109421	81112	81001
49.5	110999	109801	80928	80817
50.05	111429	110228	80677	80567
50.6	112009	110798	80320	80214
51.15	112127	110919	80281	80169
51.7	112809	111620	79934	79823
52.25	113163	111968	79930	79824
52.8	113263	112064	79501	79392
53.35	113676	112470	79224	79117
53.9	113883	112688	79135	79027
54.45	114080	112883	78693	78583
55	114335	113149	78604	78497
55.55	115206	114009	78144	78034

## Sheet: rec. roGFP2
recombinant roGFP2 + 1 µM TS2
Time [min]	400/520 nm raw data	400/520 nm blank corrected	485/520 nm raw data	485/520 nm blank corrected
0	63766	62134	162572	162389
0.55	64058	62436	163197	163011
1.1	63108	61500	160032	159848
1.65	62423	60839	157189	157009
2.2	62151	60586	155927	155748
2.75	53611	52053	132007	131830
4.4	53071	51521	130411	130236
4.95	52806	51246	129274	129100
5.5	52857	51293	128789	128612
6.05	53050	51493	128419	128241
6.6	53234	51688	128097	127922
7.15	53196	51660	127740	127566
7.7	53748	52216	127930	127758
8.25	53879	52333	127378	127206
8.8	54214	52683	127592	127424
9.35	54433	52905	127670	127499
9.9	54656	53124	127773	127603
10.45	54846	53300	127801	127629
11	55001	53471	127585	127416
11.55	55385	53861	127311	127142
12.1	55611	54082	127790	127619
12.65	55658	54128	127294	127126
13.2	55862	54315	127499	127330
13.75	56202	54672	127120	126950
14.3	56332	54803	127103	126934
14.85	56152	54637	127002	126830
15.4	56466	54920	126795	126624
15.95	56693	55169	126669	126499
16.5	56718	55190	126675	126501
17.05	56914	55374	126313	126144
17.6	57115	55565	126326	126152
18.15	57295	55756	126166	125994
18.7	57581	56032	125962	125789
19.25	57456	55911	125890	125717
19.8	57596	56039	125585	125414
20.35	57733	56183	125600	125428
20.9	62394	60856	136097	135924
21.45	62447	60904	135899	135727
22	62677	61123	135911	135739
22.55	62836	61285	135885	135715
23.1	62757	61218	135768	135594
23.65	63010	61472	135100	134929
24.2	63252	61703	135431	135258
24.75	63244	61692	135384	135213
25.3	63545	62003	135102	134929
25.85	63730	62176	135250	135076
26.4	63504	61963	134824	134652
26.95	63612	62069	134908	134737
27.5	63893	62351	134831	134661
28.05	63763	62220	134592	134420
28.6	64053	62507	134497	134325
29.15	64232	62670	134620	134447
29.7	64261	62731	134445	134272
30.25	64425	62876	134349	134175
30.8	64610	63059	134311	134141
31.35	64600	63047	134055	133886
31.9	64642	63092	134192	134020
32.45	64831	63292	133913	133740
33	64640	63065	133991	133818
33.55	64911	63345	133650	133479
34.1	65070	63521	133701	133527
34.65	65172	63612	133783	133610
35.2	65231	63663	133341	133168
35.75	65317	63750	133277	133103
36.3	65368	63816	133444	133271
36.85	65549	63990	133130	132958
37.4	65546	63984	133290	133117
37.95	65745	64180	133011	132837
38.5	65644	64085	132776	132604
39.05	65902	64348	132829	132658
39.6	65698	64104	132841	132665
40.15	65779	64213	132703	132531
40.7	65891	64330	132504	132329
41.25	66147	64583	132614	132438
41.8	66136	64554	132320	132147
42.35	66219	64656	132265	132090
42.9	66381	64805	132337	132164
43.45	66375	64807	132110	131937
44	66449	64861	132032	131856
44.55	66565	64990	131955	131779
45.1	66705	65133	132151	131979
45.65	66658	65094	131860	131685
46.2	66817	65244	131695	131521
46.75	66922	65344	131715	131542
47.3	66634	65047	131652	131471
47.85	66938	65353	131397	131219
48.4	66906	65340	131317	131139
48.95	67089	65509	131453	131278
49.5	67018	65426	131148	130974
50.05	67032	65461	131050	130876
50.6	67206	65623	131010	130837
51.15	67437	65865	131019	130845
51.7	67430	65864	130855	130679
52.25	67376	65805	130641	130470
52.8	67513	65934	130662	130488
53.35	67539	65959	130793	130616
53.9	67512	65927	130653	130477
54.45	67691	66112	130622	130445
55	68530	65909	130200	130025
55.55	68466	66276	130281	130107
