# Supplementary material for: A tryparedoxin-coupled biosensor reveals a mitochondrial trypanothione metabolism in trypanosomes
Source: eLife. 2020 Jan 31;9:e53227. doi: 10.7554/eLife.53227 (PMC7046469; doi:10.7554/eLife.53227)
Supplement: Figure 2—figure supplement 2—source data 1. [file elife-53227-fig2-figsupp2-data1.xlsx]

## Sheet: rec. Tpx-roGFP2
recombinant Tpx-roGFP2 + 10 µM T(SH)2
Time [min]	400/520 nm raw data	400/520 nm blank corrected	485/520 nm raw data	485/520 nm blank corrected
0	179753	173788	70883	70708
0.55	178024	172117	69767	69596
1.1	176739	170904	69617	69445
1.65	177057	171211	69722	69550
2.2	177437	171659	69949	69775
3.83333	171791	165830	74477	74305
4.38333	166874	160905	77253	77079
4.93333	162464	156492	80290	80116
5.48333	159303	153401	83313	83136
6.03333	155003	149094	86067	85890
6.58333	151247	145315	89190	89014
7.13333	147941	142026	91985	91808
7.68333	144818	138917	94915	94741
8.23333	142153	136221	97720	97544
8.78333	138970	133076	100305	100128
9.33333	136446	130541	103091	102914
9.88333	134000	128112	105482	105304
10.4333	131271	125408	107734	107559
10.9833	128955	123075	110130	109954
11.5333	126539	120689	112226	112053
12.0833	124672	118794	113941	113769
12.6333	122110	116201	115973	115799
13.1833	120421	114555	118003	117831
13.7333	118659	112819	119491	119314
14.2833	116489	110661	120956	120782
14.8333	114474	108658	122405	122230
15.3833	112594	106786	124260	124085
15.9333	111392	105543	125830	125657
16.4833	109673	103785	127128	126952
17.0333	108423	102576	128403	128228
17.5833	106977	101126	130041	129867
18.1333	105617	99750	131301	131124
18.6833	103841	97980	132342	132168
19.2333	103152	97311	133682	133507
19.7833	101783	95946	134996	134822
20.3333	100546	94689	135767	135588
20.8833	99738	93918	136865	136683
21.4333	98226	92363	137883	137711
21.9833	97545	91686	138674	138495
22.5333	96199	90367	139548	139369
23.0833	95435	89624	140499	140326
23.6333	94692	88860	141356	141176
24.1833	93722	87870	142335	142156
24.7333	93062	87247	143193	143016
25.2833	91826	86018	143902	143726
25.8333	91166	85333	144576	144401
26.3833	90758	84920	145265	145091
26.9333	89738	83875	145614	145439
27.4833	89253	83424	146435	146259
28.0333	88500	82676	146688	146512
28.5833	87670	81821	147699	147521
29.1333	87117	81300	147895	147720
29.6833	86744	80920	148332	148156
30.2333	86051	80227	148911	148735
30.7833	85520	79690	149729	149550
31.3333	85223	79376	150461	150287
31.8833	84614	78764	150616	150440
32.4333	84143	78285	151308	151132
32.9833	83672	77808	151589	151412
33.5333	83283	77449	152137	151960
34.0833	82807	76956	152140	151961
34.6333	82632	76788	152948	152774
35.1833	81986	76129	152792	152614
35.7333	81563	75694	153144	152967
36.2833	81699	75843	153596	153422
36.8333	81029	75173	154119	153945
37.3833	80724	74898	154560	154384
37.9333	80413	74570	154484	154307
38.4833	80045	74216	154508	154331
39.0333	79681	73864	155051	154877
39.5833	79541	73698	154985	154805
40.1333	79317	73506	155001	154825
40.6833	78778	72943	155412	155236
41.2333	78670	72841	155965	155788
41.7833	78229	72427	155909	155731
42.3333	78172	72324	156218	156040
42.8833	77823	72026	156215	156036
43.4333	77836	71984	156237	156063
43.9833	77700	71849	156613	156436
44.5333	77364	71536	156531	156353
45.0833	77251	71408	156952	156774
45.6333	77123	71321	157216	157040
46.1833	76706	70880	156981	156802
46.7333	76518	70663	157399	157222
47.2833	76441	70614	157781	157602
47.8333	76515	70693	157561	157385
48.3833	76209	70369	157864	157687
48.9333	76160	70344	157634	157459
49.4833	75850	70037	158132	157951
50.0333	75823	69941	158430	158248
50.5833	75609	69782	158103	157926
51.1333	75616	69795	158263	158085
51.6833	75537	69711	158390	158212
52.2333	75454	69666	158637	158458
52.7833	75275	69440	158592	158413
53.3333	75047	69231	158952	158773
53.8833	75125	69300	158752	158574
54.4333	74999	69128	158870	158693
54.9833	74962	69095	159136	158958
55.5333	74657	68805	158946	158768

## Sheet: rec. hGrx1-roGFP2
recombinant hGrx1-roGFP2 + 10 µM T(SH)2
Time [min]	400/520 nm raw data	400/520 nm blank corrected	485/520 nm raw data	485/520 nm blank corrected
0	184030	178894	71639	71482
0.55	181013	175917	70678	70522
1.1	181666	176618	70681	70525
1.65	179964	174910	70094	69936
2.2	179239	174202	69901	69744
3.83333	179580	174567	70238	70081
4.38333	178444	173413	69865	69708
4.93333	178266	173273	69911	69755
5.48333	177452	172400	69873	69717
6.03333	176744	171739	69821	69663
6.58333	176803	171821	69882	69727
7.13333	176538	171565	70072	69918
7.68333	176382	171405	70185	70028
8.23333	176331	171344	70294	70140
8.78333	175735	170758	70443	70287
9.33333	175429	170480	70594	70438
9.88333	175345	170386	70738	70581
10.4333	175198	170242	70890	70733
10.9833	175135	170202	71142	70986
11.5333	174855	169908	71327	71170
12.0833	174878	169899	71468	71312
12.6333	174782	169781	71668	71510
13.1833	174414	169460	71763	71606
13.7333	174253	169292	72004	71845
14.2833	174845	169862	72281	72127
14.8333	174372	169395	72465	72308
15.3833	174241	169274	72624	72469
15.9333	173909	168936	72801	72645
16.4833	173604	168593	72986	72831
17.0333	173830	168851	73241	73085
17.5833	173363	168376	73322	73165
18.1333	173256	168310	73538	73382
18.6833	173185	168214	73737	73581
19.2333	172742	167782	73936	73780
19.7833	173024	168060	74202	74043
20.3333	172734	167719	74303	74147
20.8833	172378	167405	74442	74285
21.4333	172197	167251	74542	74386
21.9833	172593	167651	74805	74647
22.5333	171830	166828	74943	74784
23.0833	171607	166647	75095	74936
23.6333	171677	166725	75294	75138
24.1833	171141	166169	75485	75328
24.7333	171631	166666	75775	75619
25.2833	171017	166046	75815	75656
25.8333	171020	166064	76090	75934
26.3833	170830	165867	76123	75965
26.9333	170575	165581	76395	76236
27.4833	170528	165570	76442	76283
28.0333	170553	165609	76783	76625
28.5833	170295	165344	76869	76711
29.1333	170166	165221	77032	76875
29.6833	169992	165079	77192	77035
30.2333	169812	164881	77372	77213
30.7833	169595	164612	77607	77448
31.3333	169522	164547	77771	77613
31.8833	169624	164658	77889	77731
32.4333	169400	164417	78147	77992
32.9833	168647	163693	78280	78119
33.5333	168751	163816	78413	78256
34.0833	168888	163910	78595	78437
34.6333	168399	163447	78697	78539
35.1833	168321	163368	78863	78704
35.7333	167961	162993	79005	78848
36.2833	167805	162825	79248	79091
36.8333	167748	162793	79387	79233
37.3833	167413	162436	79522	79365
37.9333	167561	162620	79736	79579
38.4833	167219	162265	79834	79678
39.0333	167100	162120	79975	79817
39.5833	166911	161949	80180	80023
40.1333	166543	161557	80253	80096
40.6833	166695	161718	80357	80200
41.2333	166259	161266	80667	80509
41.7833	165985	161003	80680	80522
42.3333	166253	161220	80868	80709
42.8833	166087	161093	81108	80951
43.4333	165726	160734	81243	81082
43.9833	165858	160882	81366	81206
44.5333	165514	160529	81512	81352
45.0833	165259	160303	81638	81480
45.6333	165297	160320	81817	81657
46.1833	164812	159797	81897	81737
46.7333	164723	159718	82062	81900
47.2833	164693	159654	82290	82130
47.8333	164202	159200	82352	82191
48.3833	164053	159047	82514	82353
48.9333	164141	159122	82709	82552
49.4833	164262	159281	82860	82701
50.0333	163703	158723	82969	82809
50.5833	163115	158117	83122	82963
51.1333	163511	158466	83271	83112
51.6833	163226	158187	83408	83248
52.2333	163209	158205	83527	83367
52.7833	163085	158080	83630	83471
53.3333	162966	157968	83808	83649
53.8833	162471	157467	83930	83772
54.4333	162513	157510	84086	83928
54.9833	162339	157345	84133	83974
55.5333	161994	156991	84293	84132

## Sheet: rec. roGFP2
recombinant roGFP2 + 10 µM T(SH)2
Time [min]	400/520 nm raw data	400/520 nm blank corrected	485/520 nm raw data	485/520 nm blank corrected
0	178648	173023	66582	66425
0.55	173757	168307	64892	64740
1.1	172814	167360	64703	64552
1.65	171965	166531	64332	64181
2.2	171702	166264	64442	64289
3.83333	173037	167701	65064	64911
4.38333	169644	164272	63913	63761
4.93333	167886	162511	63440	63289
5.48333	168101	162769	63217	63066
6.03333	167624	162330	62930	62780
6.58333	167298	161985	62729	62578
7.13333	166529	161243	62791	62639
7.68333	167458	162143	62844	62691
8.23333	167259	161966	62832	62680
8.78333	167403	162101	62821	62670
9.33333	167072	161775	62829	62677
9.88333	167176	161869	62727	62575
10.4333	167180	161869	62775	62623
10.9833	167586	162271	62764	62612
11.5333	167175	161861	62757	62604
12.0833	167434	162123	62735	62582
12.6333	167304	161996	62837	62685
13.1833	167542	162224	62839	62687
13.7333	167058	161765	62858	62706
14.2833	167536	162213	62886	62736
14.8333	167529	162209	62901	62747
15.3833	168104	162785	63014	62863
15.9333	167923	162644	62992	62841
16.4833	167464	162141	63001	62848
17.0333	167780	162496	63018	62867
17.5833	167638	162353	63063	62911
18.1333	168026	162713	63024	62872
18.6833	167744	162442	63125	62972
19.2333	168081	162797	63197	63044
19.7833	167691	162380	63129	62977
20.3333	168263	163008	63146	62993
20.8833	167909	162588	63220	63068
21.4333	168043	162730	63203	63051
21.9833	168019	162709	63206	63054
22.5333	168198	162905	63205	63051
23.0833	168213	162860	63278	63124
23.6333	168224	162871	63286	63132
24.1833	168313	162985	63282	63129
24.7333	168346	163014	63327	63174
25.2833	168493	163159	63359	63204
25.8333	168344	163015	63353	63199
26.3833	168132	162820	63363	63209
26.9333	168150	162803	63423	63270
27.4833	168537	163193	63389	63236
28.0333	168226	162854	63337	63183
28.5833	168438	163069	63343	63188
29.1333	168604	163238	63347	63193
29.6833	168389	163027	63339	63185
30.2333	168218	162910	63417	63263
30.7833	168813	163467	63397	63244
31.3333	168629	163249	63411	63256
31.8833	168665	163293	63409	63254
32.4333	168774	163418	63406	63250
32.9833	168240	162903	63419	63265
33.5333	168124	162802	63328	63174
34.0833	168498	163112	63323	63170
34.6333	168166	162792	63329	63173
35.1833	168183	162812	63380	63225
35.7333	168375	163015	63358	63203
36.2833	168550	163196	63337	63184
36.8333	168098	162722	63275	63120
37.3833	168300	162967	63374	63219
37.9333	167853	162501	63389	63236
38.4833	167732	162392	63319	63164
39.0333	167849	162518	63411	63258
39.5833	168437	163106	63444	63289
40.1333	168396	163021	63445	63290
40.6833	168360	162996	63466	63310
41.2333	168535	163214	63509	63355
41.7833	168605	163244	63627	63472
42.3333	168936	163563	63621	63467
42.8833	169136	163733	63611	63456
43.4333	169226	163849	63660	63505
43.9833	168986	163602	63641	63484
44.5333	169108	163748	63652	63496
45.0833	168752	163363	63674	63518
45.6333	168478	163120	63657	63501
46.1833	168890	163512	63640	63487
46.7333	168564	163183	63582	63428
47.2833	168515	163103	63628	63472
47.8333	168610	163238	63668	63511
48.3833	168807	163425	63684	63527
48.9333	168824	163434	63598	63442
49.4833	169065	163718	63691	63536
50.0333	168939	163583	63625	63468
50.5833	168328	162977	63631	63475
51.1333	168612	163245	63627	63473
51.6833	168522	163123	63637	63482
52.2333	168336	162938	63613	63459
52.7833	168230	162858	63641	63484
53.3333	168605	163235	63616	63460
53.8833	168637	163278	63546	63390
54.4333	168294	162937	63531	63375
54.9833	168198	162860	63567	63412
55.5333	168149	162772	63497	63342
