# Supplementary material for: A tryparedoxin-coupled biosensor reveals a mitochondrial trypanothione metabolism in trypanosomes
Source: eLife. 2020 Jan 31;9:e53227. doi: 10.7554/eLife.53227 (PMC7046469; doi:10.7554/eLife.53227)
Supplement: Figure 3—figure supplement 2—source data 1. [file elife-53227-fig3-figsupp2-data1.xlsx]

## Sheet: PC Tpx-roGFP2
PC Tpx-roGFP2 + 10 µM H2O2
Time [min]	400/520 nm raw data	400/520 nm blank corrected	485/520 nm raw data	485/520 nm blank corrected
0	106573	66025	178303	173558
0.55	106096	65512	177200	172470
1.1	105595	64951	176381	171642
1.65	105687	65117	176310	171561
2.2	105781	65180	175901	171154
3.3	193627	153915	103132	98460
3.85	189543	150137	106019	101366
4.4	182822	143588	110389	105763
4.95	145692	106490	138427	133795
5.5	110162	71175	161416	156803
6.05	103944	65073	164341	159709
6.6	102363	63436	164992	160405
7.15	101569	62714	165464	160869
7.7	101125	62300	165816	161221
8.25	100957	62296	166170	161593
8.8	100503	61800	166121	161535
9.35	100217	61464	166377	161799
9.9	100356	61781	166575	161994
10.45	100298	61635	166667	162091
11	100167	61598	166813	162238
11.55	100363	61697	166874	162302
12.1	100271	61465	167116	162537
12.65	100105	61303	167011	162431
13.2	100377	61751	167195	162609
13.75	100410	61714	167365	162791
14.3	100682	62015	167598	163013
14.85	100377	61542	167579	162982
15.4	100400	61741	167651	163057
15.95	100424	61700	167919	163325
16.5	100541	61786	167961	163354
17.05	100480	61709	168155	163558
17.6	100841	61961	168284	163678
18.15	100600	61780	168605	163989
18.7	100704	61857	168870	164275
19.25	101046	62095	169083	164485
19.8	100870	61959	169188	164581
20.35	100631	61729	168877	164261
20.9	101076	62148	168849	164239
21.45	101254	62298	169138	164534
22.5333	187718	149177	100788	96200
23.0833	183032	144576	104302	99739
23.6333	160806	122373	122024	117458
24.1833	111291	72973	155917	151364
24.7333	101871	63511	161349	156787
25.2833	100346	62192	162380	157836
25.8333	99557	61548	162665	158126
26.3833	98716	60702	162970	158448
26.9333	98750	60693	163158	158619
27.4833	98680	60518	163338	158818
28.0333	98839	60775	163651	159116
28.5833	98624	60499	164095	159569
29.1333	98604	60447	164221	159690
29.6833	98483	60569	164336	159809
30.2333	98375	60404	164642	160113
30.7833	98411	60278	164763	160241
31.3333	98431	60325	164793	160262
31.8833	98526	60318	164885	160351
32.4333	98213	60090	165151	160615
32.9833	98366	60247	165212	160680
33.5333	98531	60510	165366	160824
34.0833	98638	60535	165366	160821
34.6333	98579	60375	165508	160967
35.1833	98586	60412	165674	161135
35.7333	98845	60656	165661	161112
36.2833	98546	60403	165684	161143
36.8333	98638	60444	165680	161137
37.3833	98632	60430	165460	160910
37.9333	98678	60411	165423	160867
38.4833	98802	60599	165715	161163
39.0333	98650	60340	165502	160956
39.5833	98377	60263	165735	161201
40.1333	98733	60489	165785	161226
40.6833	98911	60721	165742	161184
41.2333	98766	60404	165750	161195
41.7833	98733	60376	165727	161187

## Sheet: PC roGFP2-hGrx1
PC roGFP2-hGrx1 + 10 µM H2O2
Time [min]	400/520 nm raw data	400/520 nm blank corrected	485/520 nm raw data	485/520 nm blank corrected
0	129712	52965	175749	164913
0.55	126039	49922	174812	164106
1.1	123521	47437	175720	164970
1.65	122364	46123	176490	165723
2.2	121319	44795	177382	166617
3.3	129638	57099	151216	140863
3.85	142487	70202	134782	124429
4.4	148239	75947	127260	116946
4.95	149669	77472	123826	113495
5.5	149667	77895	123338	112958
6.05	144984	72779	128677	118298
6.6	138548	66466	135761	125376
7.15	133400	61280	141838	131437
7.7	128846	56884	146683	136308
8.25	125589	53561	150566	140187
8.8	122036	50080	154136	143783
9.35	120187	48326	156786	146450
9.9	117910	46147	159289	148971
10.45	116745	44931	161269	150945
11	115140	43142	162784	152476
11.55	113659	41624	164356	153975
12.1	113429	41605	165402	155056
12.65	112189	39869	166281	155943
13.2	111834	39863	167182	156834
13.75	111801	39647	167864	157515
14.3	111499	39401	168520	158136
14.85	111117	39043	169239	158860
15.4	110656	38481	169726	159327
15.95	110651	38411	170214	159852
16.5	110558	38499	170564	160183
17.05	110608	38649	170903	160491
17.6	110274	38251	171009	160608
18.15	109746	37518	171390	160999
18.7	109970	37708	171688	161300
19.25	110076	37729	171675	161258
19.8	110119	37660	171917	161522
20.35	109664	37651	172064	161644
20.9	110073	37903	172062	161670
21.45	109675	37480	172382	161970
22.5333	118282	49578	146443	136409
23.0833	130032	61233	131770	121724
23.6333	134916	66116	125621	115571
24.1833	136932	68292	123693	113650
24.7333	134129	65571	126715	116641
25.2833	128130	59601	132829	122802
25.8333	123971	55371	138385	128365
26.3833	119852	51610	142476	132486
26.9333	116786	48516	146262	136270
27.4833	114004	45638	149117	139113
28.0333	112019	43789	151614	141649
28.5833	110232	41835	153419	143489
29.1333	108879	40738	155473	145471
29.6833	107763	39553	156755	146803
30.2333	106934	38640	158071	148035
30.7833	106838	38642	158933	148953
31.3333	105595	37400	159954	149977
31.8833	105479	37199	160382	150367
32.4333	104794	36447	161162	151138
32.9833	104525	36096	161755	151755
33.5333	104663	36313	161729	151726
34.0833	104253	35765	162342	152277
34.6333	104088	35700	162680	152677
35.1833	103804	35191	162794	152751
35.7333	104011	35332	163016	152997
36.2833	103974	35494	163341	153298
36.8333	103508	35044	163635	153590
37.3833	104037	35373	163849	153774
37.9333	103906	35310	163990	153904
38.4833	104048	35182	163803	153750
39.0333	103361	34568	164285	154227
39.5833	103666	35012	164286	154201
40.1333	103761	34828	164642	154567
40.6833	103574	34531	164693	154647
41.2333	103352	34412	164543	154481
41.7833	103433	34618	164405	154312

## Sheet: PC roGFP2
PC roGFP2 + 10 µM H2O2
Time [min]	400/520 nm raw data	400/520 nm blank corrected	485/520 nm raw data	485/520 nm blank corrected
0	127227	60026	173750	165734
0.55	123983	58677	171861	163991
1.1	122609	57659	172334	164561
1.65	121264	56703	173348	165603
2.2	120883	56285	173923	166174
3.3	119601	59857	159531	152321
3.85	125711	66254	153035	145844
4.4	130430	71138	148377	141171
4.95	133678	74331	144707	137522
5.5	135558	76106	142181	134963
6.05	134845	75483	142207	134990
6.6	131675	72225	144375	137179
7.15	129018	70004	146882	139663
7.7	126755	67720	148996	141794
8.25	124235	64788	151349	144138
8.8	122591	63102	152929	145679
9.35	120636	61339	154369	147134
9.9	119265	60200	155838	148605
10.45	117839	58580	157030	149792
11	116553	57334	158250	150999
11.55	116065	56628	159453	152206
12.1	115298	55758	160411	153129
12.65	114556	54774	161292	154005
13.2	114055	54563	162270	154993
13.75	113632	53934	163332	156008
14.3	113215	53463	163900	156544
14.85	112648	52924	164689	157365
15.4	112587	52887	165441	158104
15.95	112026	52059	165762	158451
16.5	112104	52230	166311	158980
17.05	111611	51445	166715	159362
17.6	111449	51570	167488	160133
18.15	111291	51469	168065	160687
18.7	111128	51107	168394	161055
19.25	110874	50630	168863	161476
19.8	110716	50491	169098	161722
20.35	110551	50285	169585	162202
20.9	110220	50090	169743	162357
21.45	110748	50623	169981	162577
22.5333	111164	53692	156006	148936
23.0833	117350	60089	149101	142033
23.6333	121654	64812	145019	137980
24.1833	124382	67712	141929	134866
24.7333	126125	69711	140461	133425
25.2833	124535	67954	141075	134024
25.8333	122364	66172	143109	136091
26.3833	119842	63418	145231	138221
26.9333	118096	61543	147230	140223
27.4833	116559	60231	149051	142044
28.0333	114823	58378	150641	143653
28.5833	113574	57172	151861	144845
29.1333	112556	56225	153312	146300
29.6833	111659	55268	154656	147649
30.2333	110316	53669	155315	148299
30.7833	109969	53248	156133	149080
31.3333	108895	52118	157161	150088
31.8833	108707	52028	157854	150799
32.4333	108234	51337	158096	151041
32.9833	107681	50719	158889	151817
33.5333	107396	50559	159468	152388
34.0833	107065	50060	160051	152968
34.6333	106871	49710	160673	153557
35.1833	106437	49208	160849	153753
35.7333	106312	49054	161271	154156
36.2833	106034	48768	162301	155189
36.8333	106048	48597	162714	155583
37.3833	105759	48504	163224	156118
37.9333	105607	48149	163693	156556
38.4833	105842	48661	164622	157493
39.0333	105822	48292	164826	157686
39.5833	105856	48550	164991	157842
40.1333	105729	48247	165246	158115
40.6833	105415	48224	165244	158098
41.2333	105156	47734	165065	157916
41.7833	104997	47521	165176	158058
