# Supplementary material for: A tryparedoxin-coupled biosensor reveals a mitochondrial trypanothione metabolism in trypanosomes
Source: eLife. 2020 Jan 31;9:e53227. doi: 10.7554/eLife.53227 (PMC7046469; doi:10.7554/eLife.53227)
Supplement: Figure 7—figure supplement 2—source data 1. [file elife-53227-fig7-figsupp2-data1.xlsx]

## Sheet: PC mito-roGFP2-Tpx
PC mito-roGFP2-Tpx + 10 µM H2O2
Time [min]	400/520 nm raw data	400/520 nm blank corrected	485/520 nm raw data	485/520 nm blank corrected
0	174967	50634	196979	177091
0.55	173534	48994	195065	175183
1.1	173498	49534	194218	174387
1.65	173775	49774	194490	174564
2.2	174794	50993	194442	174552
3.3	228076	105945	119749	100104
3.85	229126	108040	115315	95765
4.4	226305	105929	118386	98909
4.95	223187	103199	121839	102490
5.5	219486	100243	125329	105920
6.05	216388	97038	128601	109286
6.6	209622	90815	138206	118866
7.15	188702	69959	162934	143696
7.7	175633	57199	176262	156993
8.25	171786	52976	180762	161523
8.8	171055	52626	182434	163196
9.35	170653	51836	183395	164147
9.9	169590	51141	183333	164116
10.45	169963	51462	183464	164225
11	169717	50568	184049	164764
11.55	169330	50747	184262	165010
12.1	170003	50616	183983	164672
12.65	169516	50525	184145	164766
13.2	169341	50104	184156	164847
13.75	169351	50309	184287	164939
14.3	169465	50181	184223	164888
14.85	169087	50103	184172	164819
15.4	169513	50409	183922	164549
15.95	169623	50723	184247	164856
16.5	169657	50446	183951	164630
17.05	169530	50185	184157	164829
17.6	169588	50180	183800	164431
18.15	169345	49907	183584	164189
18.7	169405	50363	183549	164124
19.25	169848	50601	183514	164136
19.8	169689	50415	183424	164026
20.35	169637	50288	183466	164115
20.9	169702	50261	183103	163690
21.45	169615	49911	182898	163498
22.5333	213246	98715	113445	94929
23.0833	215245	101474	111155	92629
23.6333	211381	97874	116508	98088
24.1833	206747	93597	122777	104404
24.7333	188916	76291	144336	126089
25.2833	171120	59508	164065	145861
25.8333	164443	52335	170779	152519
26.3833	163116	51175	172896	154659
26.9333	162460	50697	173808	155628
27.4833	161812	49564	174548	156337
28.0333	162192	50177	175113	156928
28.5833	162303	50290	175346	157210
29.1333	161809	49940	175196	157030
29.6833	161974	49663	175456	157262
30.2333	161675	49141	175450	157310
30.7833	162195	49995	175693	157482
31.3333	161704	49216	175841	157637
31.8833	162195	49927	175779	157578
32.4333	161910	49754	175963	157705
32.9833	161894	49312	176116	157878
33.5333	162024	49977	176231	158025
34.0833	161976	49360	176182	157873
34.6333	161987	49367	176202	157998
35.1833	161875	49146	176108	157895
35.7333	161897	49089	176311	158083
36.2833	162513	49968	176513	158252
36.8333	162838	50266	176629	158374
37.3833	162595	49987	176273	158015
37.9333	162619	50048	176696	158436
38.4833	162813	50165	176622	158414
39.0333	162573	49885	177193	158947
39.5833	163384	51009	177107	158832
40.1333	162169	49402	177389	159088
40.6833	162520	49785	177237	158987
41.2333	162609	49711	177355	159063
41.7833	163071	50002	177457	159143

## Sheet: PC mito-roGFP2-hGrx1
PC mito-roGFP2-hGrx1 + 10 µM H2O2
Time [min]	400/520 nm raw data	400/520 nm blank corrected	485/520 nm raw data	485/520 nm blank corrected
0	145047	54679	173799	159894
0.55	142434	53379	171667	157974
1.1	140866	52518	170097	156586
1.65	139687	52160	168931	155433
2.2	139063	51769	168510	155122
3.3	155348	69152	145578	132257
3.85	171436	85353	128785	115490
4.4	179388	93316	119887	106591
4.95	183683	97637	115285	101913
5.5	183684	97538	115186	101775
6.05	180897	95085	117851	104516
6.6	176946	90874	121022	107660
7.15	173621	87699	124528	111179
7.7	169967	84028	127603	114300
8.25	167081	81368	130289	117000
8.8	164127	78498	132906	119615
9.35	161724	76188	135344	122042
9.9	159107	73682	136983	123690
10.45	157297	72136	139350	126099
11	154856	69465	141145	127881
11.55	154113	68692	142775	129517
12.1	151975	66635	144455	131237
12.65	150621	65632	145564	132358
13.2	148928	63764	146725	133485
13.75	148079	63069	148030	134767
14.3	147008	61767	148928	135676
14.85	145904	61113	149873	136620
15.4	144461	59502	150619	137391
15.95	143945	59010	151411	138125
16.5	142850	57893	152240	139037
17.05	142082	57098	152833	139626
17.6	141711	56877	153604	140384
18.15	140867	56055	154089	140861
18.7	140622	55775	154560	141306
19.25	139948	55179	155020	141779
19.8	138831	53970	155510	142288
20.35	138528	53646	155962	142718
20.9	138360	53439	156218	142977
21.45	137968	53152	156300	143066
22.5333	151309	65818	143026	129690
23.0833	162213	76874	130908	117583
23.6333	168341	83369	124363	111077
24.1833	171421	86334	120927	107635
24.7333	171000	85863	120491	107174
25.2833	168351	83338	122478	109196
25.8333	165598	80722	125136	111841
26.3833	162614	77928	127813	114585
26.9333	160562	75628	130313	117087
27.4833	158069	73390	132304	119063
28.0333	155930	71468	134275	121044
28.5833	153751	69262	136389	123176
29.1333	152314	67922	137833	124623
29.6833	150397	65622	139507	126306
30.2333	148890	64401	140924	127749
30.7833	147593	63236	142421	129240
31.3333	146718	62332	143565	130369
31.8833	144741	60023	144811	131617
32.4333	144414	59724	145853	132618
32.9833	143221	58417	146724	133586
33.5333	142172	57701	147507	134281
34.0833	141352	56576	148251	135079
34.6333	140507	55730	149023	135862
35.1833	139667	55615	149361	136205
35.7333	139062	54562	150553	137357
36.2833	138684	53991	150919	137733
36.8333	137781	53261	151629	138464
37.3833	137110	52738	151955	138805
37.9333	136796	52250	152565	139388
38.4833	136091	51659	152801	139611
39.0333	135986	51464	153356	140153
39.5833	136137	51783	153746	140597
40.1333	135129	50901	153952	140764
40.6833	134608	50059	154247	141077
41.2333	134600	50187	154498	141358
41.7833	134283	50023	154755	141567

## Sheet: PC mito-roGFP2
PC mito-roGFP2 + 10 µM H2O2
Time [min]	400/520 nm raw data	400/520 nm blank corrected	485/520 nm raw data	485/520 nm blank corrected
0	159819	62314	202540	187815
0.55	158957	61434	201423	186732
1.1	159889	62169	200834	186104
1.65	159551	61685	200643	185821
2.2	159461	61421	199937	185084
3.3	161633	65303	185899	171286
3.85	168183	72234	178449	163891
4.4	172890	77296	171800	157206
4.95	177191	81567	167469	152939
5.5	179327	83957	165237	150719
6.05	178382	82984	165419	150850
6.6	177091	81429	165955	151368
7.15	176897	81792	166632	152078
7.7	176155	81134	166965	152356
8.25	176085	81053	167885	153336
8.8	174507	79065	168710	154202
9.35	174525	79262	168850	154264
9.9	173503	78553	169689	155149
10.45	172852	77621	170427	155930
11	173544	77985	170883	156368
11.55	172879	77605	171368	156782
12.1	172093	76895	172028	157475
12.65	171860	76662	172625	158168
13.2	171678	76522	172672	158146
13.75	171097	75683	173390	158839
14.3	170996	75556	173303	158724
14.85	170089	74480	173904	159353
15.4	170314	74786	174187	159577
15.95	169346	74110	174972	160379
16.5	169773	74356	175232	160667
17.05	169313	73805	176038	161435
17.6	169194	73682	176340	161758
18.15	168992	73572	176876	162324
18.7	168155	72338	176972	162359
19.25	168432	72450	177314	162775
19.8	167854	72159	177651	163052
20.35	167522	71706	178572	163979
20.9	167756	72254	178669	164048
21.45	167539	71889	178711	164074
22.5333	162710	69581	164516	150212
23.0833	166187	72870	158747	144480
23.6333	169030	76454	156586	142318
24.1833	168790	76370	156482	142235
24.7333	168644	76183	156986	142798
25.2833	167889	75602	157690	143506
25.8333	166685	74761	158510	144355
26.3833	166012	73870	159098	144969
26.9333	165944	74095	159408	145221
27.4833	165260	72967	160111	145990
28.0333	165400	73432	160811	146698
28.5833	164950	73148	161268	147107
29.1333	164542	72455	162059	147918
29.6833	164075	72150	162748	148591
30.2333	163706	71861	163024	148932
30.7833	163688	71529	163734	149571
31.3333	162603	70277	164082	149880
31.8833	162897	70661	164681	150564
32.4333	162558	70552	164893	150734
32.9833	162782	70882	165602	151400
33.5333	162041	70080	165883	151751
34.0833	161650	69318	165794	151637
34.6333	161352	69071	166179	152020
35.1833	160836	68810	166631	152506
35.7333	160825	68641	166806	152640
36.2833	160519	68155	166939	152783
36.8333	160158	68283	167436	153259
37.3833	160211	68074	168045	153914
37.9333	160093	68077	167926	153742
38.4833	159805	67623	168652	154503
39.0333	159351	67177	168574	154426
39.5833	158935	66372	169082	154900
40.1333	158773	66277	169322	155159
40.6833	158929	66559	169622	155433
41.2333	158430	66287	169949	155734
41.7833	158616	65965	169788	155603
